# Supplementary material for: Altered Transcript Levels of MMP13 and VIT Genes in the Muscle and Connective Tissue of Pigs with Umbilical Hernia
Source: MDPI journal article supplement (doi:10.3390/genes14101903), 2023-10-01
Supplement: s1 [file s1]

**Supplementary Material for:** “Altered transcript levels of *MMP13* and *VIT* genes in the muscle and connective tissue of pigs with umbilical hernia”, by Jakub Wozniak et al.

**Table S1.** Primer sequences for the *ACAN*, *COL6A5*, *MMP13*, *VIT*, *H3F3A* and *PPIA* genes used in qPCR and for the *MMP13* and *VIT* genes used in pyrosequencing.

| Analysis       | Target gene   | Primer sequence                                                                                              | Amplicon size |
|----------------|---------------|--------------------------------------------------------------------------------------------------------------|---------------|
| qPCR           | <i>ACAN</i>   | F: 5' CAGGAGGGGTTGTGTTCCATTA 3'<br>R: 5' CCTCCTCGAAAGTCAGTGAGTAG 3'                                          | 63 bp         |
|                | <i>COL6A5</i> | F: 5' AGCTTTGGGCAGAACTTTGA 3'<br>R: 5' TGCCAGAACTATCCACCAGA 3'                                               | 124 bp        |
|                | <i>MMP13</i>  | F: 5' AAGAGCATGGAGACTTCTACCC 3'<br>R: 5' GGAGGAAAAGCATGAGCCAA 3'                                             | 64 bp         |
|                | <i>VIT</i>    | F: 5' GTCGAAGCCACCCACACTG 3'<br>R: 5' AAGTCAGGTTCTCCCCCA 3'                                                  | 119bp         |
|                | <i>H3F3A</i>  | F: 5' CTTTGCAGGAGGCAAGTGAG 3'<br>R: 5' TGGCATGGATAGCACACAGG 3'                                               | 72 bp         |
|                | <i>PPIA</i>   | F: 5' CACAAACGGTTCCTCAGTTTT 3'<br>R: 5' TGTCCACAGTCAGCAATGGT 3'                                              | 171 bp        |
| pyrosequencing | <i>MMP13</i>  | F: GGTTATGATGATTAAGTAAAGGTTAGT<br>R-biot*: TCCACCAACTCCAACAACCTCT<br>Seq**: AGAGATAGTTTATAAAAATTTTGTG        | 318 bp        |
|                | <i>VIT</i>    | F: GAGGTAGGTTGGAGGATGAGATTT<br>R-biot*:<br>TATCAAACCTCCTTACTAAAATTAACCACAAA<br>Seq**: TTTGTAGTAAGATTTGTTTGAA | 292 bp        |

PCR primers were designed based on pig genome sequence: Sscrofa11.1 (*ACAN* - GenBank ID: 397255, *COL6A5* - GenBank ID: 100515967, *MMP13* - GenBank ID: 397346, *VIT* - GenBank ID: 100524557). \*reverse primer labeled with biotin; \*\*sequencing primer

**Table S2.** CpG genomic position according to Sscrofa11.1. and their location in the gene context.

| Gene         | Cytosines | Chromosome position | Gene context               |
|--------------|-----------|---------------------|----------------------------|
| <i>MMP13</i> | CpG1      | chr9: 33616595      | 5'UTR (exon 1, variant X2) |
|              | CpG2      | chr9: 33616586      | 5'UTR (exon 1, variant X2) |
|              | CpG3      | chr9: 33616563      | 5'UTR (exon 1, variant X2) |
|              | CpG4      | chr9: 33616557      | 5'UTR (exon 1, variant X2) |
|              | CpG5      | chr9: 33616546      | 5'UTR (exon 1, variant X2) |
|              | CpG6      | chr9: 33616521      | 5'UTR (exon 1, variant X2) |
|              | CpG7      | chr9: 33616509      | 5'UTR (exon 1, variant X2) |
| <i>VIT</i>   | CpG1      | chr3: 103384464     | exon 12, variant X4        |
|              | CpG2      | chr3: 103384458     | exon 12, variant X4        |
|              | CpG3      | chr3: 103384452     | exon 12, variant X4        |
|              | CpG4      | chr3: 103384446     | exon 12, variant X4        |
|              | CpG5      | chr3: 103384443     | exon 12, variant X4        |
|              | CpG6      | chr3: 103384431     | exon 12, variant X4        |
|              | CpG7      | chr3: 103384412     | exon 12, variant X4        |

CpG positions were selected based on pig genome sequence: Sscrofa11.1 (*MMP13* - GenBank ID: 397346, *VIT* - GenBank ID: 100524557).

**Table S3.** The mean percentage of DNA methylation with standard deviation and p-value in each studied cytosine, in two examined genes (*MMP13* and *VIT*), for both control and umbilical hernia groups.

| Gene         | Cytosines | Umbilical hernia group |                    | Control group |                    | p-value |
|--------------|-----------|------------------------|--------------------|---------------|--------------------|---------|
|              |           | Mean                   | Standard deviation | Mean          | Standard deviation |         |
| <i>MMP13</i> | CpG1      | 2.7941                 | 0.7294             | 2.8235        | 2.0371             | 0.1593  |
|              | CpG2      | 30.1765                | 4.6546             | 29.9706       | 6.4172             | 0.6436  |
|              | CpG3      | 65.7059                | 5.1081             | 64.5294       | 6.0914             | 0.1477  |
|              | CpG4      | 18.3235                | 1.4296             | 17.7353       | 1.1886             | 0.0993  |
|              | CpG5      | 26.0882                | 2.9580             | 25.5000       | 2.0634             | 0.4793  |
|              | CpG6      | 18.6471                | 3.5665             | 18.3235       | 3.8433             | 0.7273  |
|              | CpG7      | 34.4118                | 5.2346             | 29.1765       | 3.7374             | p<0.001 |
| <i>VIT</i>   | CpG1      | 78.4118                | 8.3016             | 77.7647       | 6.8625             | 0.4572  |
|              | CpG2      | 88.6177                | 4.2783             | 88.9412       | 4.6250             | 0.8578  |
|              | CpG3      | 96.2059                | 2.5320             | 96.6471       | 2.3469             | 0.5147  |
|              | CpG4      | 87.7059                | 2.2500             | 88.2353       | 2.5113             | 0.6896  |
|              | CpG5      | 77.7059                | 3.6889             | 76.7647       | 3.1533             | 0.2367  |
|              | CpG6      | 59.1765                | 5.7812             | 59.0882       | 6.5983             | 0.9706  |
|              | CpG7      | 97.7059                | 3.1482             | 98.3529       | 2.0727             | 0.7742  |
